# Supplementary material for: Exposure-response associations between chronic exposure to fine particulate matter and risks of hospital admission for major cardiovascular diseases: population based cohort study
Source: PubMed Central journal article supplement — BMJ. 2024 Feb 21;384:e076939. doi: 10.1136/bmj-2023-076939 (PMC10879983; doi:10.1136/bmj-2023-076939), 2024-02-21

## **Supplementary Materials**

**Supplementary Table S1. ICD-codes used for the identification of hospitalizations for the studied CVD subtypes**

**Supplementary Methods. Methodology for PM<sub>2.5</sub> exposure calibration**

**Supplementary Table S2. Summary statistics of neighborhood-level covariates**

**Supplementary Table S3. Median PM<sub>2.5</sub> levels within exposure intervals for the entire Medicare FFS cohort**

**Supplementary Table S4. Numerical results for Figure 3**

**Supplementary Table S5. Numerical results for Figure 4**

**Supplementary Table S6. Numerical results for Figure 5**

**Supplementary Table S7. Numerical results for Figure 6**

**Supplementary Table S8. Numerical results for Figure 7**

**Supplementary Table S9. Numerical results for Figure 8**

**Supplementary Table S10. Numerical results for Figure 9**

**Supplementary Table S11. Numerical results for Figure 10**

**Supplementary Figure S1. E-R relationships between calibrated lag 0–2 PM<sub>2.5</sub> concentration and relative risks (and 95% CIs) of incident hospitalizations for subtypes of arrhythmia**

**Supplementary Figure S2. E-R relationships between calibrated lag 0–2 PM<sub>2.5</sub> concentration and relative risks (and 95% CIs) of incident hospitalizations for subtypes of valvular heart disease**

**Supplementary Figure S3. E-R relationships between calibrated lag 0–2 PM<sub>2.5</sub> exposure and relative risks (and 95% CIs) of incident CVD hospitalizations, excluding individual-level characteristics**

**Supplementary Table S1. ICD codes used for the identification of CVD subtypes**

|                                            | <b>ICD-9</b>                                                                                   | <b>ICD-10</b>                                                                                                                                                                               |
|--------------------------------------------|------------------------------------------------------------------------------------------------|---------------------------------------------------------------------------------------------------------------------------------------------------------------------------------------------|
| Ischemic heart disease                     | 410.x, 411.x, 412.x, 413.x,<br>414.x                                                           | I20.x, I21.x, I22.x, I23.x,<br>I24.x, I25.x                                                                                                                                                 |
| Cerebrovascular disease                    | 430.x, 431.x, 432.x, 433.x,<br>434.x, 435.x, 436.x, 437.x,<br>438.x                            | I60.x, I61.x, I62.x, I63.x,<br>I64.x, I65.x, I66.x, I67.x,<br>I68.x, I69.x                                                                                                                  |
| Heart failure                              | 398.91, 402.01, 402.11,<br>402.91, 404.01, 404.03,<br>404.11, 404.13, 404.91,<br>404.93, 428.x | I50.x                                                                                                                                                                                       |
| Cardiomyopathy                             | 425.x                                                                                          | I42.x                                                                                                                                                                                       |
| Arrhythmia                                 | 426.x, 427.x, 785.0                                                                            | I44.x, I45.x, I47.x, I48.x,<br>I49.x, R00.0, R00.1, R00.8,<br>R94.31, T82.1, T82.11,<br>T82.110, T82.111, T82.118,<br>T82.119, Z45.0, Z45.01,<br>Z45.010, Z45.018, Z45.02,<br>Z45.09, Z95.0 |
| Valvular heart disease                     | 424.x                                                                                          | I34.x, I35.x, I36.x, I37.x,<br>I38.x, I39.x                                                                                                                                                 |
| Thoracic and abdominal<br>aortic aneurysms | 441.x                                                                                          | I71.x                                                                                                                                                                                       |

### **Supplementary Methods. Methodology for PM<sub>2.5</sub> exposure calibration**

The predicted PM<sub>2.5</sub> levels at grid cells were modeled and validated using monitored data. Therefore, it is possible that the prediction model's performance in terms of accuracy may be better for grid cells with monitors compared to those without monitors. To account for the fact that some areas had more PM<sub>2.5</sub> monitors than the others, we used a regression calibration approach with inverse probability weighting to correct for measurement error of the predicted PM<sub>2.5</sub>.

We created an indicator variable to determine the presence of PM<sub>2.5</sub> monitors in each ZIP code and year from 2000 to 2016 (coded as 1 if there were operating monitors and 0 otherwise). We performed a logistic regression using population density, racial demographics (percent Black, percent Hispanic, percent Asian), percent poverty, distance between industrial facility and the center of ZIP code, road density, normalized difference vegetation index (NDVI), and tree canopy as predictors. The fitted logistic regression was used to predict the probability of having at least one operating monitor for ZIP code-years. By taking the inverse of the probability, we obtained weight for each ZIP code-year combination. These weights were used to account for the sampling bias caused by the variation in the presence of monitors across ZIP code-years.

We collected daily monitored PM<sub>2.5</sub> data for the entire study period and aggregated them at the seasonal level, resulting in one observation for each season in each year. We then stratified the seasonal aggregates by census divisions (New England, Middle Atlantic, East North Central, West North Central, South Atlantic, East South Central, West South Central, Mountain and Pacific regions), season, and elevation (above or below 75th percentile), resulting in 72 strata.

We aggregated predicted PM<sub>2.5</sub> values for the days corresponding to the available monitored data and stratified them in the same manner as the monitored data. These predicted values were then linked to the monitored data by season, year, and ZIP code. The estimated weights were linked to those aggregates by ZIP code and year. The calibrated PM<sub>2.5</sub> levels were obtained as below:

- a. Within each of the 72 strata, we randomly generated 1,000 bootstrap samples. Each bootstrap sample had the same number of observations as the original stratum.
- b. For each bootstrap sample, we regressed the monitored PM<sub>2.5</sub> against the predicted PM<sub>2.5</sub> and other variables using simple linear regressions and incorporating the estimated weights:  $E(PM_{2.5 \text{ monitored}}) = \beta_0 + \beta_1 PM_{2.5 \text{ predicted}} + \beta_2 \text{wind speed} + \beta_3 \text{humidity} + \beta_4 \text{impervious surface} + \beta_5 I(2000 - 2003) + \beta_6 I(2004 - 2007) + \beta_7 I(2008 - 2011) + \beta_8 I(2012 - 2016)$ .

The betas for each stratum and bootstrap sample were used to obtain the calibrated PM<sub>2.5</sub> at grid cells given predicted values. Specifically, the predicted daily PM<sub>2.5</sub> at grid cells across the contiguous US were aggregated and stratified in the same way as the monitored data. This gave us 1,000 sets of calibrated PM<sub>2.5</sub> for each grid cell and season through 2000–2016 based on the betas for each stratum as  $PM_{2.5 \text{ calibrated}} = \widehat{\beta}_0 + \widehat{\beta}_1 PM_{2.5 \text{ predicted}} + \widehat{\beta}_2 \text{wind speed} + \widehat{\beta}_3 \text{humidity} + \widehat{\beta}_4 \text{impervious surface} + \widehat{\beta}_5 I(2000 - 2003) + \widehat{\beta}_6 I(2004 - 2007) + \widehat{\beta}_7 I(2008 - 2011) + \widehat{\beta}_8 I(2012 - 2016)$ . Given that our exposure of interest was annual PM<sub>2.5</sub>, we calculated the annual average calibrated PM<sub>2.5</sub> in each grid cell by averaging the values across the four seasons within the year and obtained 1,000 calibrated annual PM<sub>2.5</sub> levels in each grid cell and each year through the study period.

**Supplementary Table S2. Summary statistics of neighborhood-level covariates**

|                                                                                                     | <b>Mean</b> | <b>SD</b> |
|-----------------------------------------------------------------------------------------------------|-------------|-----------|
| Proportion of population $\geq 65$ years of age living below the poverty line (%)                   | 9.4         | 6.5       |
| Population density (persons/mi <sup>2</sup> )                                                       | 3109.2      | 8751.7    |
| Median value of owner-occupied properties (USD)                                                     | 201505.4    | 161483.5  |
| Proportion of housing units occupied by the owner (%)                                               | 68.5        | 15.7      |
| Proportion of the population identified as Hispanic (%)                                             | 11.6        | 16.7      |
| Proportion of the population $\geq 65$ years of age who had not graduated from high school (%)      | 24.8        | 14.4      |
| Mean BMI (kg/m <sup>2</sup> )                                                                       | 27.7        | 1.7       |
| Percent of ever-smokers (%)                                                                         | 46.4        | 6.9       |
| Annual lung cancer hospitalization rate ( $\times 10^4$ %)                                          | 3.9         | 3.7       |
| Proportion of Medicare beneficiaries who received at least one hemoglobin A1c test per year (%)     | 83.3        | 4.9       |
| Proportion of beneficiaries who had at least one ambulatory doctor visit per year (%)               | 78.4        | 6.1       |
| Percent of beneficiaries who had at least one low-density lipoprotein cholesterol test per year (%) | 79.6        | 6.3       |
| Proportion of female beneficiaries who received a mammogram within a two-year period (%)            | 64.0        | 6.7       |
| Proportion of beneficiaries who had at least one eye exam per year (%)                              | 67.4%       | 5.8%      |
| Distance to the nearest hospital (km)                                                               | 6.7         | 7.6       |
| Annual warm-season ozone from April–September (ppb)                                                 | 44.9        | 5.8       |
| Annual nitrogen dioxide (ppb)                                                                       | 18.7        | 9.8       |
| Annual temperature (°C)                                                                             | 14.1        | 4.6       |

**Supplementary Table S3. Median PM<sub>2.5</sub> levels within exposure intervals for the entire Medicare FFS cohort**

| <b>Exposure interval</b> | <b>Median</b> |
|--------------------------|---------------|
| [0, 5)                   | 4.02          |
| [5, 6)                   | 5.54          |
| [6, 7)                   | 6.54          |
| [7, 8)                   | 7.55          |
| [8, 9)                   | 8.54          |
| [9, 10)                  | 9.50          |
| [10, 11)                 | 10.48         |
| [11, 12)                 | 11.47         |
| [12, 13)                 | 12.47         |
| [13, 14)                 | 13.46         |
| [14, ∞)                  | 14.87         |

**Supplementary Table S4. Numerical results for Figure 3**

|                         | <b>Exposure interval</b> | <b>Relative risk</b> | <b>95% CI</b>  |
|-------------------------|--------------------------|----------------------|----------------|
| Composite CVD           | [0, 5)                   | 1                    | NA             |
|                         | [5, 6)                   | 1.062                | (1.052, 1.072) |
|                         | [6, 7)                   | 1.115                | (1.105, 1.124) |
|                         | [7, 8)                   | 1.172                | (1.163, 1.181) |
|                         | [8, 9)                   | 1.221                | (1.211, 1.230) |
|                         | [9, 10)                  | 1.291                | (1.281, 1.300) |
|                         | [10, 11)                 | 1.400                | (1.390, 1.411) |
|                         | [11, 12)                 | 1.538                | (1.526, 1.550) |
|                         | [12, 13)                 | 1.665                | (1.652, 1.678) |
|                         | [13, 14)                 | 1.742                | (1.728, 1.756) |
|                         | [14, ∞)                  | 1.810                | (1.795, 1.824) |
| Ischemic heart disease  | [0, 5)                   | 1                    | NA             |
|                         | [5, 6)                   | 1.009                | (0.995, 1.023) |
|                         | [6, 7)                   | 1.038                | (1.025, 1.051) |
|                         | [7, 8)                   | 1.073                | (1.061, 1.086) |
|                         | [8, 9)                   | 1.124                | (1.111, 1.136) |
|                         | [9, 10)                  | 1.211                | (1.198, 1.224) |
|                         | [10, 11)                 | 1.346                | (1.332, 1.361) |
|                         | [11, 12)                 | 1.535                | (1.518, 1.552) |
|                         | [12, 13)                 | 1.698                | (1.679, 1.717) |
|                         | [13, 14)                 | 1.813                | (1.792, 1.834) |
|                         | [14, ∞)                  | 1.898                | (1.877, 1.921) |
| Cerebrovascular disease | [0, 5)                   | 1                    | NA             |
|                         | [5, 6)                   | 1.091                | (1.075, 1.107) |
|                         | [6, 7)                   | 1.158                | (1.143, 1.173) |
|                         | [7, 8)                   | 1.242                | (1.227, 1.257) |
|                         | [8, 9)                   | 1.309                | (1.293, 1.325) |
|                         | [9, 10)                  | 1.389                | (1.373, 1.405) |
|                         | [10, 11)                 | 1.484                | (1.466, 1.501) |
|                         | [11, 12)                 | 1.606                | (1.587, 1.626) |
|                         | [12, 13)                 | 1.722                | (1.701, 1.743) |
|                         | [13, 14)                 | 1.781                | (1.759, 1.804) |
|                         | [14, ∞)                  | 1.822                | (1.799, 1.846) |
| Heart failure           | [0, 5)                   | 1                    | NA             |
|                         | [5, 6)                   | 1.193                | (1.172, 1.215) |
|                         | [6, 7)                   | 1.327                | (1.305, 1.349) |
|                         | [7, 8)                   | 1.452                | (1.429, 1.474) |
|                         | [8, 9)                   | 1.527                | (1.504, 1.549) |
|                         | [9, 10)                  | 1.620                | (1.597, 1.644) |
|                         | [10, 11)                 | 1.766                | (1.740, 1.792) |
|                         | [11, 12)                 | 1.939                | (1.910, 1.968) |
|                         | [12, 13)                 | 2.097                | (2.066, 2.129) |
|                         | [13, 14)                 | 2.180                | (2.146, 2.214) |
|                         | [14, ∞)                  | 2.315                | (2.279, 2.351) |
| Cardiomyopathy          | [0, 5)                   | 1                    | NA             |



|                                         |                 |       |                |
|-----------------------------------------|-----------------|-------|----------------|
|                                         | [5, 6)          | 1.073 | (0.961, 1.199) |
|                                         | [6, 7)          | 1.106 | (1.001, 1.223) |
|                                         | [7, 8)          | 1.128 | (1.028, 1.239) |
|                                         | [8, 9)          | 1.147 | (1.049, 1.254) |
|                                         | [9, 10)         | 1.279 | (1.171, 1.397) |
|                                         | [10, 11)        | 1.375 | (1.259, 1.502) |
|                                         | [11, 12)        | 1.494 | (1.366, 1.635) |
|                                         | [12, 13)        | 1.641 | (1.497, 1.799) |
|                                         | [13, 14)        | 1.748 | (1.589, 1.923) |
|                                         | [14, $\infty$ ) | 1.775 | (1.614, 1.953) |
| Arrhythmia                              | [0, 5)          | 1     | NA             |
|                                         | [5, 6)          | 1.126 | (1.109, 1.143) |
|                                         | [6, 7)          | 1.232 | (1.216, 1.249) |
|                                         | [7, 8)          | 1.317 | (1.301, 1.334) |
|                                         | [8, 9)          | 1.351 | (1.335, 1.367) |
|                                         | [9, 10)         | 1.406 | (1.389, 1.423) |
|                                         | [10, 11)        | 1.479 | (1.461, 1.496) |
|                                         | [11, 12)        | 1.563 | (1.544, 1.582) |
|                                         | [12, 13)        | 1.627 | (1.607, 1.648) |
|                                         | [13, 14)        | 1.646 | (1.624, 1.667) |
|                                         | [14, $\infty$ ) | 1.640 | (1.619, 1.662) |
| Valvular heart disease                  | [0, 5)          | 1     | NA             |
|                                         | [5, 6)          | 1.088 | (1.057, 1.120) |
|                                         | [6, 7)          | 1.093 | (1.064, 1.122) |
|                                         | [7, 8)          | 1.131 | (1.104, 1.159) |
|                                         | [8, 9)          | 1.072 | (1.048, 1.098) |
|                                         | [9, 10)         | 1.002 | (0.978, 1.025) |
|                                         | [10, 11)        | 0.943 | (0.921, 0.965) |
|                                         | [11, 12)        | 0.881 | (0.859, 0.903) |
|                                         | [12, 13)        | 0.847 | (0.825, 0.869) |
|                                         | [13, 14)        | 0.811 | (0.789, 0.834) |
|                                         | [14, $\infty$ ) | 0.764 | (0.743, 0.787) |
| Thoracic and abdominal aortic aneurysms | [0, 5)          | 1     | NA             |
|                                         | [5, 6)          | 1.013 | (0.976, 1.050) |
|                                         | [6, 7)          | 1.018 | (0.984, 1.052) |
|                                         | [7, 8)          | 1.030 | (0.999, 1.063) |
|                                         | [8, 9)          | 1.050 | (1.019, 1.081) |
|                                         | [9, 10)         | 1.075 | (1.044, 1.107) |
|                                         | [10, 11)        | 1.137 | (1.104, 1.171) |
|                                         | [11, 12)        | 1.216 | (1.181, 1.253) |
|                                         | [12, 13)        | 1.261 | (1.223, 1.301) |
|                                         | [13, 14)        | 1.308 | (1.266, 1.351) |
|                                         | [14, $\infty$ ) | 1.265 | (1.224, 1.306) |

**Supplementary Table S5. Numerical results for Figure 4**

|                         | <b>Exposure interval</b> | <b>Absolute risk (%)</b> | <b>95% CI (%)</b> |
|-------------------------|--------------------------|--------------------------|-------------------|
| Composite CVD           | [0, 5)                   | 2.592                    | NA                |
|                         | [5, 6)                   | 2.753                    | (2.728, 2.779)    |
|                         | [6, 7)                   | 2.890                    | (2.866, 2.914)    |
|                         | [7, 8)                   | 3.038                    | (3.014, 3.062)    |
|                         | [8, 9)                   | 3.164                    | (3.140, 3.188)    |
|                         | [9, 10)                  | 3.346                    | (3.322, 3.371)    |
|                         | [10, 11)                 | 3.630                    | (3.603, 3.657)    |
|                         | [11, 12)                 | 3.987                    | (3.957, 4.017)    |
|                         | [12, 13)                 | 4.316                    | (4.282, 4.349)    |
|                         | [13, 14)                 | 4.515                    | (4.479, 4.551)    |
|                         | [14, ∞)                  | 4.691                    | (4.654, 4.729)    |
| Ischemic heart disease  | [0, 5)                   | 0.975                    | NA                |
|                         | [5, 6)                   | 0.983                    | (0.970, 0.997)    |
|                         | [6, 7)                   | 1.012                    | (0.999, 1.024)    |
|                         | [7, 8)                   | 1.046                    | (1.034, 1.058)    |
|                         | [8, 9)                   | 1.095                    | (1.083, 1.107)    |
|                         | [9, 10)                  | 1.180                    | (1.167, 1.193)    |
|                         | [10, 11)                 | 1.312                    | (1.298, 1.327)    |
|                         | [11, 12)                 | 1.496                    | (1.480, 1.513)    |
|                         | [12, 13)                 | 1.655                    | (1.636, 1.674)    |
|                         | [13, 14)                 | 1.767                    | (1.746, 1.788)    |
|                         | [14, ∞)                  | 1.850                    | (1.829, 1.872)    |
| Cerebrovascular disease | [0, 5)                   | 0.7646                   | NA                |
|                         | [5, 6)                   | 0.8343                   | (0.822, 0.847)    |
|                         | [6, 7)                   | 0.8853                   | (0.874, 0.897)    |
|                         | [7, 8)                   | 0.9496                   | (0.938, 0.961)    |
|                         | [8, 9)                   | 1.0008                   | (0.989, 1.013)    |
|                         | [9, 10)                  | 1.0619                   | (1.049, 1.075)    |
|                         | [10, 11)                 | 1.1344                   | (1.121, 1.148)    |
|                         | [11, 12)                 | 1.2283                   | (1.214, 1.243)    |
|                         | [12, 13)                 | 1.3164                   | (1.300, 1.333)    |
|                         | [13, 14)                 | 1.3620                   | (1.345, 1.380)    |
|                         | [14, ∞)                  | 1.3934                   | (1.376, 1.411)    |
| Heart failure           | [0, 5)                   | 0.548                    | NA                |
|                         | [5, 6)                   | 0.654                    | (0.642, 0.666)    |
|                         | [6, 7)                   | 0.727                    | (0.715, 0.739)    |
|                         | [7, 8)                   | 0.795                    | (0.783, 0.808)    |
|                         | [8, 9)                   | 0.837                    | (0.824, 0.849)    |
|                         | [9, 10)                  | 0.888                    | (0.875, 0.901)    |
|                         | [10, 11)                 | 0.967                    | (0.953, 0.982)    |
|                         | [11, 12)                 | 1.062                    | (1.047, 1.078)    |
|                         | [12, 13)                 | 1.149                    | (1.132, 1.167)    |
|                         | [13, 14)                 | 1.195                    | (1.176, 1.213)    |
|                         | [14, ∞)                  | 1.268                    | (1.249, 1.288)    |
| Cardiomyopathy          | [0, 5)                   | 0.012                    | NA                |

|                                         |                 |       |                |
|-----------------------------------------|-----------------|-------|----------------|
|                                         | [5, 6)          | 0.013 | (0.012, 0.015) |
|                                         | [6, 7)          | 0.014 | (0.012, 0.015) |
|                                         | [7, 8)          | 0.014 | (0.013, 0.015) |
|                                         | [8, 9)          | 0.014 | (0.013, 0.016) |
|                                         | [9, 10)         | 0.016 | (0.015, 0.017) |
|                                         | [10, 11)        | 0.017 | (0.016, 0.019) |
|                                         | [11, 12)        | 0.019 | (0.017, 0.020) |
|                                         | [12, 13)        | 0.020 | (0.019, 0.022) |
|                                         | [13, 14)        | 0.022 | (0.020, 0.024) |
|                                         | [14, $\infty$ ) | 0.022 | (0.020, 0.024) |
| Arrhythmia                              | [0, 5)          | 0.656 | NA             |
|                                         | [5, 6)          | 0.738 | (0.727, 0.749) |
|                                         | [6, 7)          | 0.808 | (0.797, 0.819) |
|                                         | [7, 8)          | 0.864 | (0.853, 0.874) |
|                                         | [8, 9)          | 0.886 | (0.875, 0.896) |
|                                         | [9, 10)         | 0.922 | (0.911, 0.933) |
|                                         | [10, 11)        | 0.970 | (0.958, 0.981) |
|                                         | [11, 12)        | 1.025 | (1.013, 1.038) |
|                                         | [12, 13)        | 1.067 | (1.054, 1.081) |
|                                         | [13, 14)        | 1.079 | (1.065, 1.093) |
| Valvular heart disease                  | [0, 5)          | 0.130 | NA             |
|                                         | [5, 6)          | 0.141 | (0.137, 0.145) |
|                                         | [6, 7)          | 0.142 | (0.138, 0.145) |
|                                         | [7, 8)          | 0.147 | (0.143, 0.150) |
|                                         | [8, 9)          | 0.139 | (0.136, 0.142) |
|                                         | [9, 10)         | 0.130 | (0.127, 0.133) |
|                                         | [10, 11)        | 0.122 | (0.119, 0.125) |
|                                         | [11, 12)        | 0.114 | (0.111, 0.117) |
|                                         | [12, 13)        | 0.110 | (0.107, 0.113) |
|                                         | [13, 14)        | 0.105 | (0.102, 0.108) |
| Thoracic and abdominal aortic aneurysms | [0, 5)          | 0.099 | NA             |
|                                         | [5, 6)          | 0.100 | (0.097, 0.104) |
|                                         | [6, 7)          | 0.101 | (0.098, 0.104) |
|                                         | [7, 8)          | 0.102 | (0.099, 0.105) |
|                                         | [8, 9)          | 0.104 | (0.101, 0.107) |
|                                         | [9, 10)         | 0.107 | (0.103, 0.110) |
|                                         | [10, 11)        | 0.113 | (0.109, 0.116) |
|                                         | [11, 12)        | 0.121 | (0.117, 0.124) |
|                                         | [12, 13)        | 0.125 | (0.121, 0.129) |
|                                         | [13, 14)        | 0.130 | (0.125, 0.134) |
|                                         | [14, $\infty$ ) | 0.125 | (0.121, 0.129) |

**Supplementary Table S6. Numerical results for Figure 5**

|                         | Exposure interval | Lag 0          |                | Lag 1          |                | Lag 2          |                |
|-------------------------|-------------------|----------------|----------------|----------------|----------------|----------------|----------------|
|                         |                   | Relative risk  | 95% CI         | Relative risk  | 95% CI         | Relative risk  | 95% CI         |
| Composite CVD           | [0, 5)            | 1              | NA             | 1              | NA             | 1              | NA             |
|                         | [5, 6)            | 1.076          | (1.066, 1.086) | 1.069          | (1.058, 1.080) | 1.085          | (1.074, 1.097) |
|                         | [6, 7)            | 1.132          | (1.123, 1.142) | 1.132          | (1.121, 1.142) | 1.142          | (1.131, 1.153) |
|                         | [7, 8)            | 1.202          | (1.192, 1.211) | 1.186          | (1.176, 1.197) | 1.195          | (1.184, 1.206) |
|                         | [8, 9)            | 1.255          | (1.245, 1.265) | 1.234          | (1.224, 1.245) | 1.233          | (1.222, 1.243) |
|                         | [9, 10)           | 1.358          | (1.348, 1.369) | 1.314          | (1.303, 1.325) | 1.310          | (1.299, 1.322) |
|                         | [10, 11)          | 1.468          | (1.457, 1.480) | 1.423          | (1.412, 1.435) | 1.398          | (1.385, 1.410) |
|                         | [11, 12)          | 1.608          | (1.595, 1.621) | 1.553          | (1.540, 1.566) | 1.533          | (1.520, 1.546) |
|                         | [12, 13)          | 1.739          | (1.725, 1.754) | 1.677          | (1.663, 1.692) | 1.654          | (1.639, 1.669) |
|                         | [13, 14)          | 1.816          | (1.800, 1.831) | 1.757          | (1.741, 1.773) | 1.727          | (1.711, 1.743) |
| [14, ∞)                 | 1.858             | (1.842, 1.875) | 1.827          | (1.810, 1.843) | 1.823          | (1.807, 1.839) |                |
| Ischemic heart disease  | [0, 5)            | 1              | NA             | 1              | NA             | 1              | NA             |
|                         | [5, 6)            | 1.020          | (1.006, 1.034) | 1.025          | (1.009, 1.040) | 1.048          | (1.032, 1.065) |
|                         | [6, 7)            | 1.058          | (1.044, 1.071) | 1.062          | (1.047, 1.077) | 1.071          | (1.056, 1.087) |
|                         | [7, 8)            | 1.121          | (1.108, 1.135) | 1.107          | (1.093, 1.122) | 1.114          | (1.099, 1.129) |
|                         | [8, 9)            | 1.179          | (1.166, 1.193) | 1.159          | (1.144, 1.173) | 1.150          | (1.135, 1.165) |
|                         | [9, 10)           | 1.312          | (1.297, 1.327) | 1.255          | (1.240, 1.271) | 1.243          | (1.228, 1.259) |
|                         | [10, 11)          | 1.454          | (1.437, 1.471) | 1.396          | (1.379, 1.413) | 1.356          | (1.338, 1.373) |
|                         | [11, 12)          | 1.661          | (1.641, 1.680) | 1.580          | (1.561, 1.600) | 1.542          | (1.523, 1.562) |
|                         | [12, 13)          | 1.827          | (1.805, 1.849) | 1.738          | (1.716, 1.761) | 1.688          | (1.666, 1.710) |
|                         | [13, 14)          | 1.933          | (1.908, 1.957) | 1.863          | (1.838, 1.887) | 1.799          | (1.775, 1.823) |
| [14, ∞)                 | 1.992             | (1.967, 2.018) | 1.946          | (1.921, 1.971) | 1.925          | (1.899, 1.950) |                |
| Cerebrovascular disease | [0, 5)            | 1              | NA             | 1              | NA             | 1              | NA             |
|                         | [5, 6)            | 1.113          | (1.096, 1.129) | 1.095          | (1.078, 1.113) | 1.097          | (1.079, 1.116) |
|                         | [6, 7)            | 1.184          | (1.168, 1.200) | 1.172          | (1.155, 1.190) | 1.179          | (1.161, 1.197) |
|                         | [7, 8)            | 1.264          | (1.248, 1.281) | 1.247          | (1.230, 1.264) | 1.245          | (1.227, 1.263) |
|                         | [8, 9)            | 1.345          | (1.329, 1.362) | 1.315          | (1.297, 1.332) | 1.304          | (1.286, 1.323) |
|                         | [9, 10)           | 1.441          | (1.423, 1.459) | 1.396          | (1.377, 1.414) | 1.386          | (1.367, 1.405) |
|                         | [10, 11)          | 1.541          | (1.522, 1.560) | 1.494          | (1.475, 1.514) | 1.468          | (1.448, 1.488) |
|                         | [11, 12)          | 1.645          | (1.624, 1.666) | 1.603          | (1.582, 1.625) | 1.583          | (1.561, 1.605) |
|                         | [12, 13)          | 1.765          | (1.742, 1.788) | 1.719          | (1.696, 1.743) | 1.706          | (1.682, 1.730) |
|                         | [13, 14)          | 1.834          | (1.809, 1.859) | 1.783          | (1.758, 1.808) | 1.761          | (1.736, 1.787) |
| [14, ∞)                 | 1.854             | (1.828, 1.880) | 1.820          | (1.795, 1.846) | 1.826          | (1.800, 1.852) |                |
| Heart failure           | [0, 5)            | 1              | NA             | 1              | NA             | 1              | NA             |
|                         | [5, 6)            | 1.216          | (1.194, 1.238) | 1.191          | (1.168, 1.215) | 1.207          | (1.182, 1.232) |
|                         | [6, 7)            | 1.329          | (1.307, 1.351) | 1.339          | (1.315, 1.363) | 1.350          | (1.325, 1.376) |
|                         | [7, 8)            | 1.451          | (1.429, 1.474) | 1.447          | (1.423, 1.472) | 1.472          | (1.445, 1.498) |
|                         | [8, 9)            | 1.534          | (1.511, 1.558) | 1.516          | (1.491, 1.541) | 1.533          | (1.506, 1.560) |
|                         | [9, 10)           | 1.666          | (1.641, 1.692) | 1.620          | (1.594, 1.647) | 1.633          | (1.605, 1.661) |
|                         | [10, 11)          | 1.798          | (1.770, 1.825) | 1.756          | (1.728, 1.785) | 1.742          | (1.713, 1.772) |
|                         | [11, 12)          | 1.965          | (1.935, 1.996) | 1.927          | (1.895, 1.959) | 1.916          | (1.883, 1.949) |
|                         | [12, 13)          | 2.137          | (2.103, 2.171) | 2.078          | (2.044, 2.114) | 2.070          | (2.034, 2.106) |
|                         | [13, 14)          | 2.228          | (2.192, 2.265) | 2.159          | (2.122, 2.197) | 2.151          | (2.113, 2.190) |
| [14, ∞)                 | 2.316             | (2.278, 2.355) | 2.290          | (2.251, 2.330) | 2.313          | (2.273, 2.354) |                |
| Cardiomyopathy          | [0, 5)            | 1              | NA             | 1              | NA             | 1              | NA             |
|                         | [5, 6)            | 1.070          | (0.958, 1.197) | 1.087          | (0.963, 1.227) | 1.022          | (0.900, 1.159) |
|                         | [6, 7)            | 1.125          | (1.016, 1.246) | 1.168          | (1.045, 1.305) | 1.096          | (0.977, 1.229) |
|                         | [7, 8)            | 1.163          | (1.057, 1.280) | 1.161          | (1.046, 1.290) | 1.135          | (1.019, 1.264) |
|                         | [8, 9)            | 1.209          | (1.101, 1.328) | 1.196          | (1.080, 1.324) | 1.159          | (1.044, 1.286) |
|                         | [9, 10)           | 1.332          | (1.214, 1.462) | 1.312          | (1.187, 1.450) | 1.229          | (1.110, 1.362) |
|                         | [10, 11)          | 1.469          | (1.338, 1.612) | 1.427          | (1.291, 1.578) | 1.344          | (1.214, 1.488) |
|                         | [11, 12)          | 1.589          | (1.445, 1.747) | 1.572          | (1.420, 1.739) | 1.479          | (1.334, 1.639) |
| [12, 13)                | 1.725             | (1.564, 1.902) | 1.719          | (1.549, 1.907) | 1.602          | (1.443, 1.779) |                |

|                                         |          |       |                |       |                |       |                |
|-----------------------------------------|----------|-------|----------------|-------|----------------|-------|----------------|
|                                         | [13, 14) | 1.789 | (1.615, 1.981) | 1.777 | (1.597, 1.978) | 1.662 | (1.493, 1.850) |
|                                         | [14, ∞)  | 1.804 | (1.624, 2.004) | 1.831 | (1.645, 2.038) | 1.774 | (1.597, 1.971) |
| Arrhythmia                              | [0, 5)   | 1     | NA             | 1     | NA             | 1     | NA             |
|                                         | [5, 6)   | 1.147 | (1.130, 1.164) | 1.138 | (1.120, 1.157) | 1.147 | (1.128, 1.167) |
|                                         | [6, 7)   | 1.246 | (1.229, 1.263) | 1.242 | (1.224, 1.260) | 1.256 | (1.237, 1.276) |
|                                         | [7, 8)   | 1.329 | (1.313, 1.346) | 1.313 | (1.295, 1.331) | 1.323 | (1.304, 1.342) |
|                                         | [8, 9)   | 1.361 | (1.344, 1.378) | 1.342 | (1.324, 1.360) | 1.349 | (1.331, 1.369) |
|                                         | [9, 10)  | 1.434 | (1.416, 1.451) | 1.403 | (1.384, 1.422) | 1.411 | (1.391, 1.430) |
|                                         | [10, 11) | 1.507 | (1.488, 1.526) | 1.479 | (1.459, 1.499) | 1.471 | (1.451, 1.492) |
|                                         | [11, 12) | 1.571 | (1.551, 1.591) | 1.551 | (1.530, 1.572) | 1.559 | (1.537, 1.581) |
|                                         | [12, 13) | 1.633 | (1.612, 1.654) | 1.611 | (1.588, 1.633) | 1.625 | (1.602, 1.648) |
|                                         | [13, 14) | 1.647 | (1.624, 1.670) | 1.636 | (1.613, 1.660) | 1.650 | (1.626, 1.675) |
|                                         | [14, ∞)  | 1.637 | (1.614, 1.661) | 1.644 | (1.621, 1.668) | 1.669 | (1.645, 1.693) |
| Valvular heart disease                  | [0, 5)   | 1     | NA             | 1     | NA             | 1     | NA             |
|                                         | [5, 6)   | 1.068 | (1.038, 1.098) | 1.072 | (1.040, 1.106) | 1.077 | (1.043, 1.113) |
|                                         | [6, 7)   | 1.084 | (1.056, 1.113) | 1.080 | (1.050, 1.111) | 1.102 | (1.069, 1.135) |
|                                         | [7, 8)   | 1.083 | (1.056, 1.110) | 1.095 | (1.066, 1.125) | 1.124 | (1.093, 1.156) |
|                                         | [8, 9)   | 1.021 | (0.997, 1.046) | 1.039 | (1.013, 1.067) | 1.064 | (1.036, 1.093) |
|                                         | [9, 10)  | 0.950 | (0.927, 0.973) | 0.979 | (0.954, 1.004) | 1.008 | (0.982, 1.036) |
|                                         | [10, 11) | 0.894 | (0.872, 0.916) | 0.927 | (0.903, 0.952) | 0.954 | (0.929, 0.980) |
|                                         | [11, 12) | 0.844 | (0.823, 0.866) | 0.868 | (0.845, 0.892) | 0.906 | (0.881, 0.931) |
|                                         | [12, 13) | 0.807 | (0.785, 0.829) | 0.819 | (0.797, 0.843) | 0.855 | (0.831, 0.879) |
|                                         | [13, 14) | 0.775 | (0.752, 0.798) | 0.797 | (0.773, 0.821) | 0.826 | (0.801, 0.851) |
|                                         | [14, ∞)  | 0.745 | (0.722, 0.769) | 0.757 | (0.734, 0.780) | 0.765 | (0.743, 0.788) |
| Thoracic and abdominal aortic aneurysms | [0, 5)   | 1     | NA             | 1     | NA             | 1     | NA             |
|                                         | [5, 6)   | 1.036 | (0.999, 1.075) | 1.009 | (0.970, 1.050) | 1.026 | (0.984, 1.070) |
|                                         | [6, 7)   | 1.034 | (1.000, 1.070) | 1.035 | (0.998, 1.073) | 1.044 | (1.005, 1.084) |
|                                         | [7, 8)   | 1.063 | (1.030, 1.097) | 1.038 | (1.003, 1.074) | 1.057 | (1.019, 1.095) |
|                                         | [8, 9)   | 1.080 | (1.047, 1.114) | 1.055 | (1.020, 1.090) | 1.064 | (1.028, 1.101) |
|                                         | [9, 10)  | 1.136 | (1.101, 1.171) | 1.096 | (1.061, 1.133) | 1.104 | (1.067, 1.142) |
|                                         | [10, 11) | 1.200 | (1.164, 1.238) | 1.154 | (1.117, 1.192) | 1.140 | (1.102, 1.179) |
|                                         | [11, 12) | 1.261 | (1.221, 1.301) | 1.225 | (1.185, 1.266) | 1.229 | (1.187, 1.271) |
|                                         | [12, 13) | 1.301 | (1.259, 1.344) | 1.269 | (1.226, 1.313) | 1.267 | (1.223, 1.312) |
|                                         | [13, 14) | 1.338 | (1.292, 1.385) | 1.307 | (1.262, 1.355) | 1.303 | (1.257, 1.351) |
|                                         | [14, ∞)  | 1.303 | (1.257, 1.351) | 1.287 | (1.242, 1.334) | 1.301 | (1.256, 1.348) |

**Supplementary Table S7. Numerical results for Figure 6**

|                         | Exposure interval | Female        |                | Male          |                |
|-------------------------|-------------------|---------------|----------------|---------------|----------------|
|                         |                   | Relative risk | 95% CI         | Relative risk | 95% CI         |
| Composite CVD           | [0, 5)            | 1             | NA             | 1             | NA             |
|                         | [5, 6)            | 1.074         | (1.060, 1.089) | 1.060         | (1.047, 1.073) |
|                         | [6, 7)            | 1.135         | (1.121, 1.149) | 1.111         | (1.099, 1.124) |
|                         | [7, 8)            | 1.205         | (1.191, 1.219) | 1.161         | (1.149, 1.173) |
|                         | [8, 9)            | 1.260         | (1.246, 1.274) | 1.208         | (1.196, 1.220) |
|                         | [9, 10)           | 1.341         | (1.327, 1.356) | 1.271         | (1.258, 1.283) |
|                         | [10, 11)          | 1.456         | (1.440, 1.472) | 1.380         | (1.367, 1.394) |
|                         | [11, 12)          | 1.605         | (1.587, 1.623) | 1.515         | (1.500, 1.531) |
|                         | [12, 13)          | 1.733         | (1.713, 1.753) | 1.650         | (1.633, 1.667) |
|                         | [13, 14)          | 1.811         | (1.790, 1.832) | 1.732         | (1.713, 1.751) |
|                         | [14, ∞)           | 1.891         | (1.869, 1.914) | 1.791         | (1.772, 1.810) |
| Ischemic heart disease  | [0, 5)            | 1             | NA             | 1             | NA             |
|                         | [5, 6)            | 1.035         | (1.013, 1.057) | 1.007         | (0.990, 1.024) |
|                         | [6, 7)            | 1.074         | (1.053, 1.095) | 1.038         | (1.022, 1.054) |
|                         | [7, 8)            | 1.127         | (1.106, 1.147) | 1.070         | (1.054, 1.085) |
|                         | [8, 9)            | 1.185         | (1.165, 1.206) | 1.122         | (1.106, 1.137) |
|                         | [9, 10)           | 1.292         | (1.270, 1.315) | 1.202         | (1.186, 1.219) |
|                         | [10, 11)          | 1.449         | (1.424, 1.474) | 1.335         | (1.317, 1.353) |
|                         | [11, 12)          | 1.670         | (1.641, 1.699) | 1.517         | (1.496, 1.537) |
|                         | [12, 13)          | 1.848         | (1.816, 1.881) | 1.687         | (1.664, 1.711) |
|                         | [13, 14)          | 1.980         | (1.944, 2.017) | 1.802         | (1.776, 1.828) |
|                         | [14, ∞)           | 2.101         | (2.063, 2.140) | 1.869         | (1.842, 1.896) |
| Cerebrovascular disease | [0, 5)            | 1             | NA             | 1             | NA             |
|                         | [5, 6)            | 1.082         | (1.061, 1.104) | 1.102         | (1.079, 1.126) |
|                         | [6, 7)            | 1.148         | (1.127, 1.169) | 1.171         | (1.148, 1.194) |
|                         | [7, 8)            | 1.237         | (1.217, 1.259) | 1.249         | (1.227, 1.272) |
|                         | [8, 9)            | 1.304         | (1.283, 1.325) | 1.318         | (1.295, 1.341) |
|                         | [9, 10)           | 1.392         | (1.369, 1.414) | 1.388         | (1.365, 1.412) |
|                         | [10, 11)          | 1.485         | (1.461, 1.509) | 1.486         | (1.461, 1.512) |
|                         | [11, 12)          | 1.616         | (1.589, 1.642) | 1.599         | (1.571, 1.627) |
|                         | [12, 13)          | 1.726         | (1.697, 1.755) | 1.722         | (1.691, 1.753) |
|                         | [13, 14)          | 1.780         | (1.749, 1.811) | 1.790         | (1.756, 1.824) |
|                         | [14, ∞)           | 1.820         | (1.789, 1.852) | 1.833         | (1.799, 1.868) |
| Heart failure           | [0, 5)            | 1             | NA             | 1             | NA             |
|                         | [5, 6)            | 1.179         | (1.150, 1.210) | 1.211         | (1.180, 1.242) |
|                         | [6, 7)            | 1.317         | (1.287, 1.348) | 1.342         | (1.311, 1.374) |
|                         | [7, 8)            | 1.447         | (1.417, 1.479) | 1.464         | (1.432, 1.497) |
|                         | [8, 9)            | 1.535         | (1.504, 1.567) | 1.526         | (1.495, 1.559) |
|                         | [9, 10)           | 1.642         | (1.608, 1.676) | 1.607         | (1.573, 1.641) |
|                         | [10, 11)          | 1.796         | (1.760, 1.834) | 1.744         | (1.707, 1.781) |
|                         | [11, 12)          | 1.982         | (1.941, 2.023) | 1.905         | (1.864, 1.945) |
|                         | [12, 13)          | 2.146         | (2.101, 2.192) | 2.059         | (2.015, 2.104) |
|                         | [13, 14)          | 2.233         | (2.185, 2.282) | 2.138         | (2.090, 2.187) |
|                         | [14, ∞)           | 2.382         | (2.331, 2.434) | 2.257         | (2.207, 2.309) |
| Cardiomyopathy          | [0, 5)            | 1             | NA             | 1             | NA             |
|                         | [5, 6)            | 1.038         | (0.885, 1.218) | 1.113         | (0.957, 1.294) |
|                         | [6, 7)            | 1.057         | (0.915, 1.222) | 1.165         | (1.016, 1.335) |
|                         | [7, 8)            | 1.033         | (0.903, 1.183) | 1.237         | (1.089, 1.405) |

|                                         |                 |       |                |       |                |
|-----------------------------------------|-----------------|-------|----------------|-------|----------------|
|                                         | [8, 9)          | 1.100 | (0.967, 1.251) | 1.213 | (1.073, 1.371) |
|                                         | [9, 10)         | 1.199 | (1.056, 1.361) | 1.385 | (1.227, 1.563) |
|                                         | [10, 11)        | 1.296 | (1.141, 1.472) | 1.488 | (1.318, 1.679) |
|                                         | [11, 12)        | 1.357 | (1.192, 1.545) | 1.679 | (1.486, 1.899) |
|                                         | [12, 13)        | 1.510 | (1.323, 1.725) | 1.832 | (1.616, 2.078) |
|                                         | [13, 14)        | 1.630 | (1.421, 1.870) | 1.935 | (1.698, 2.205) |
|                                         | [14, $\infty$ ) | 1.622 | (1.414, 1.861) | 2.008 | (1.763, 2.287) |
| Arrhythmia                              | [0, 5)          | 1     | NA             | 1     | NA             |
|                                         | [5, 6)          | 1.132 | (1.108, 1.155) | 1.124 | (1.100, 1.148) |
|                                         | [6, 7)          | 1.235 | (1.212, 1.259) | 1.236 | (1.213, 1.259) |
|                                         | [7, 8)          | 1.326 | (1.302, 1.349) | 1.318 | (1.295, 1.341) |
|                                         | [8, 9)          | 1.365 | (1.342, 1.388) | 1.347 | (1.324, 1.370) |
|                                         | [9, 10)         | 1.432 | (1.408, 1.456) | 1.391 | (1.367, 1.414) |
|                                         | [10, 11)        | 1.504 | (1.479, 1.530) | 1.467 | (1.442, 1.492) |
|                                         | [11, 12)        | 1.590 | (1.563, 1.617) | 1.553 | (1.527, 1.580) |
|                                         | [12, 13)        | 1.649 | (1.620, 1.678) | 1.628 | (1.599, 1.657) |
|                                         | [13, 14)        | 1.662 | (1.632, 1.693) | 1.654 | (1.624, 1.685) |
|                                         | [14, $\infty$ ) | 1.655 | (1.625, 1.685) | 1.653 | (1.623, 1.684) |
| Valvular heart disease                  | [0, 5)          | 1     | NA             | 1     | NA             |
|                                         | [5, 6)          | 1.100 | (1.051, 1.152) | 1.092 | (1.053, 1.133) |
|                                         | [6, 7)          | 1.136 | (1.090, 1.183) | 1.083 | (1.047, 1.120) |
|                                         | [7, 8)          | 1.207 | (1.161, 1.254) | 1.105 | (1.071, 1.140) |
|                                         | [8, 9)          | 1.163 | (1.120, 1.207) | 1.039 | (1.008, 1.070) |
|                                         | [9, 10)         | 1.087 | (1.048, 1.128) | 0.972 | (0.943, 1.001) |
|                                         | [10, 11)        | 1.032 | (0.994, 1.071) | 0.911 | (0.884, 0.939) |
|                                         | [11, 12)        | 0.972 | (0.935, 1.009) | 0.849 | (0.823, 0.877) |
|                                         | [12, 13)        | 0.940 | (0.903, 0.979) | 0.816 | (0.789, 0.844) |
|                                         | [13, 14)        | 0.909 | (0.871, 0.949) | 0.776 | (0.748, 0.805) |
|                                         | [14, $\infty$ ) | 0.875 | (0.838, 0.913) | 0.718 | (0.692, 0.746) |
| Thoracic and abdominal aortic aneurysms | [0, 5)          | 1     | NA             | 1     | NA             |
|                                         | [5, 6)          | 1.008 | (0.939, 1.083) | 1.035 | (0.994, 1.079) |
|                                         | [6, 7)          | 1.038 | (0.974, 1.107) | 1.044 | (1.006, 1.083) |
|                                         | [7, 8)          | 1.076 | (1.014, 1.143) | 1.058 | (1.022, 1.095) |
|                                         | [8, 9)          | 1.087 | (1.026, 1.151) | 1.091 | (1.056, 1.128) |
|                                         | [9, 10)         | 1.126 | (1.064, 1.191) | 1.120 | (1.084, 1.157) |
|                                         | [10, 11)        | 1.168 | (1.104, 1.237) | 1.204 | (1.166, 1.244) |
|                                         | [11, 12)        | 1.261 | (1.190, 1.335) | 1.296 | (1.254, 1.340) |
|                                         | [12, 13)        | 1.281 | (1.207, 1.360) | 1.371 | (1.324, 1.419) |
|                                         | [13, 14)        | 1.325 | (1.245, 1.410) | 1.432 | (1.381, 1.485) |
|                                         | [14, $\infty$ ) | 1.282 | (1.204, 1.365) | 1.392 | (1.343, 1.444) |

**Supplementary Table S8. Numerical results for Figure 7**

|                         | Exposure interval | 65–74 years    |                | ≥75 years      |                |
|-------------------------|-------------------|----------------|----------------|----------------|----------------|
|                         |                   | Relative risk  | 95% CI         | Relative risk  | 95% CI         |
| Composite CVD           | [0, 5)            | 1              | NA             | 1              | NA             |
|                         | [5, 6)            | 1.041          | (1.027, 1.055) | 1.067          | (1.055, 1.078) |
|                         | [6, 7)            | 1.080          | (1.067, 1.094) | 1.123          | (1.112, 1.134) |
|                         | [7, 8)            | 1.134          | (1.121, 1.147) | 1.180          | (1.169, 1.191) |
|                         | [8, 9)            | 1.198          | (1.185, 1.212) | 1.214          | (1.203, 1.225) |
|                         | [9, 10)           | 1.282          | (1.268, 1.296) | 1.265          | (1.254, 1.277) |
|                         | [10, 11)          | 1.391          | (1.376, 1.406) | 1.352          | (1.340, 1.364) |
|                         | [11, 12)          | 1.534          | (1.517, 1.551) | 1.461          | (1.448, 1.474) |
|                         | [12, 13)          | 1.666          | (1.647, 1.685) | 1.560          | (1.546, 1.575) |
|                         | [13, 14)          | 1.732          | (1.711, 1.752) | 1.627          | (1.611, 1.642) |
| [14, ∞)                 | 1.795             | (1.774, 1.816) | 1.679          | (1.663, 1.695) |                |
| Ischemic heart disease  | [0, 5)            | 1              | NA             | 1              | NA             |
|                         | [5, 6)            | 0.994          | (0.974, 1.014) | 1.017          | (0.998, 1.036) |
|                         | [6, 7)            | 1.008          | (0.990, 1.026) | 1.057          | (1.039, 1.075) |
|                         | [7, 8)            | 1.041          | (1.024, 1.059) | 1.092          | (1.075, 1.109) |
|                         | [8, 9)            | 1.103          | (1.086, 1.121) | 1.129          | (1.113, 1.146) |
|                         | [9, 10)           | 1.206          | (1.187, 1.225) | 1.197          | (1.180, 1.215) |
|                         | [10, 11)          | 1.352          | (1.331, 1.373) | 1.314          | (1.294, 1.333) |
|                         | [11, 12)          | 1.556          | (1.531, 1.581) | 1.477          | (1.455, 1.499) |
|                         | [12, 13)          | 1.736          | (1.708, 1.765) | 1.615          | (1.590, 1.640) |
|                         | [13, 14)          | 1.846          | (1.815, 1.878) | 1.727          | (1.700, 1.754) |
| [14, ∞)                 | 1.922             | (1.889, 1.955) | 1.814          | (1.786, 1.843) |                |
| Cerebrovascular disease | [0, 5)            | 1              | NA             | 1              | (1.067, 1.103) |
|                         | [5, 6)            | 1.064          | (1.038, 1.091) | 1.085          | (1.125, 1.159) |
|                         | [6, 7)            | 1.126          | (1.101, 1.151) | 1.142          | (1.199, 1.233) |
|                         | [7, 8)            | 1.215          | (1.190, 1.241) | 1.216          | (1.251, 1.285) |
|                         | [8, 9)            | 1.306          | (1.280, 1.332) | 1.268          | (1.313, 1.349) |
|                         | [9, 10)           | 1.401          | (1.374, 1.429) | 1.331          | (1.383, 1.420) |
|                         | [10, 11)          | 1.504          | (1.474, 1.534) | 1.401          | (1.482, 1.523) |
|                         | [11, 12)          | 1.625          | (1.593, 1.658) | 1.503          | (1.573, 1.617) |
|                         | [12, 13)          | 1.745          | (1.709, 1.781) | 1.595          | (1.620, 1.668) |
|                         | [13, 14)          | 1.800          | (1.762, 1.839) | 1.644          | (1.644, 1.692) |
| [14, ∞)                 | 1.851             | (1.812, 1.891) | 1.668          | (1.067, 1.103) |                |
| Heart failure           | [0, 5)            | 1              | NA             | 1              | NA             |
|                         | [5, 6)            | 1.139          | (1.099, 1.181) | 1.185          | (1.162, 1.207) |
|                         | [6, 7)            | 1.250          | (1.210, 1.290) | 1.308          | (1.285, 1.330) |
|                         | [7, 8)            | 1.382          | (1.341, 1.424) | 1.419          | (1.396, 1.442) |
|                         | [8, 9)            | 1.508          | (1.466, 1.552) | 1.471          | (1.449, 1.494) |
|                         | [9, 10)           | 1.646          | (1.599, 1.693) | 1.537          | (1.514, 1.561) |
|                         | [10, 11)          | 1.812          | (1.761, 1.864) | 1.646          | (1.621, 1.672) |
|                         | [11, 12)          | 2.031          | (1.973, 2.090) | 1.772          | (1.744, 1.799) |
|                         | [12, 13)          | 2.231          | (2.166, 2.298) | 1.887          | (1.857, 1.917) |
|                         | [13, 14)          | 2.324          | (2.254, 2.396) | 1.948          | (1.916, 1.980) |
| [14, ∞)                 | 2.530             | (2.455, 2.608) | 2.037          | (2.004, 2.070) |                |
| Cardiomyopathy          | [0, 5)            | 1              | NA             | 1              | NA             |
|                         | [5, 6)            | 1.060          | (0.906, 1.240) | 1.087          | (0.931, 1.270) |
|                         | [6, 7)            | 1.078          | (0.935, 1.243) | 1.136          | (0.987, 1.307) |
|                         | [7, 8)            | 1.090          | (0.955, 1.245) | 1.167          | (1.023, 1.330) |
|                         | [8, 9)            | 1.121          | (0.988, 1.273) | 1.173          | (1.034, 1.330) |



|                                         |                 |       |                |       |                |
|-----------------------------------------|-----------------|-------|----------------|-------|----------------|
|                                         | [9, 10)         | 1.221 | (1.077, 1.383) | 1.339 | (1.183, 1.516) |
|                                         | [10, 11)        | 1.335 | (1.178, 1.513) | 1.412 | (1.247, 1.599) |
|                                         | [11, 12)        | 1.502 | (1.322, 1.705) | 1.479 | (1.303, 1.678) |
|                                         | [12, 13)        | 1.662 | (1.458, 1.894) | 1.610 | (1.415, 1.832) |
|                                         | [13, 14)        | 1.759 | (1.535, 2.015) | 1.727 | (1.511, 1.973) |
|                                         | [14, $\infty$ ) | 1.786 | (1.559, 2.046) | 1.752 | (1.533, 2.002) |
| Arrhythmia                              | [0, 5)          | 1     | NA             | 1     | NA             |
|                                         | [5, 6)          | 1.101 | (1.074, 1.128) | 1.118 | (1.099, 1.137) |
|                                         | [6, 7)          | 1.194 | (1.168, 1.221) | 1.218 | (1.199, 1.237) |
|                                         | [7, 8)          | 1.275 | (1.249, 1.302) | 1.297 | (1.279, 1.316) |
|                                         | [8, 9)          | 1.323 | (1.297, 1.349) | 1.322 | (1.304, 1.341) |
|                                         | [9, 10)         | 1.390 | (1.363, 1.418) | 1.362 | (1.343, 1.381) |
|                                         | [10, 11)        | 1.467 | (1.439, 1.496) | 1.412 | (1.393, 1.432) |
|                                         | [11, 12)        | 1.563 | (1.532, 1.594) | 1.470 | (1.450, 1.491) |
|                                         | [12, 13)        | 1.635 | (1.602, 1.669) | 1.512 | (1.491, 1.534) |
|                                         | [13, 14)        | 1.649 | (1.614, 1.685) | 1.522 | (1.500, 1.545) |
|                                         | [14, $\infty$ ) | 1.642 | (1.607, 1.678) | 1.510 | (1.488, 1.533) |
| Valvular heart disease                  | [0, 5)          | 1     | NA             | 1     | NA             |
|                                         | [5, 6)          | 1.024 | (0.976, 1.073) | 1.111 | (1.072, 1.151) |
|                                         | [6, 7)          | 1.024 | (0.981, 1.069) | 1.106 | (1.071, 1.143) |
|                                         | [7, 8)          | 1.052 | (1.011, 1.094) | 1.148 | (1.114, 1.183) |
|                                         | [8, 9)          | 1.015 | (0.977, 1.054) | 1.077 | (1.046, 1.109) |
|                                         | [9, 10)         | 0.969 | (0.933, 1.007) | 0.988 | (0.960, 1.017) |
|                                         | [10, 11)        | 0.949 | (0.913, 0.986) | 0.899 | (0.873, 0.926) |
|                                         | [11, 12)        | 0.913 | (0.877, 0.950) | 0.818 | (0.793, 0.843) |
|                                         | [12, 13)        | 0.905 | (0.868, 0.944) | 0.766 | (0.742, 0.791) |
|                                         | [13, 14)        | 0.884 | (0.845, 0.925) | 0.722 | (0.697, 0.747) |
|                                         | [14, $\infty$ ) | 0.841 | (0.803, 0.880) | 0.674 | (0.651, 0.698) |
| Thoracic and abdominal aortic aneurysms | [0, 5)          | 1     | NA             | 1     | NA             |
|                                         | [5, 6)          | 1.021 | (0.966, 1.078) | 0.993 | (0.946, 1.043) |
|                                         | [6, 7)          | 1.005 | (0.957, 1.057) | 1.009 | (0.966, 1.055) |
|                                         | [7, 8)          | 1.006 | (0.960, 1.053) | 1.030 | (0.988, 1.073) |
|                                         | [8, 9)          | 1.051 | (1.005, 1.098) | 1.028 | (0.988, 1.069) |
|                                         | [9, 10)         | 1.087 | (1.041, 1.136) | 1.041 | (1.001, 1.082) |
|                                         | [10, 11)        | 1.171 | (1.121, 1.223) | 1.078 | (1.037, 1.121) |
|                                         | [11, 12)        | 1.273 | (1.218, 1.331) | 1.133 | (1.089, 1.179) |
|                                         | [12, 13)        | 1.336 | (1.276, 1.399) | 1.159 | (1.113, 1.208) |
|                                         | [13, 14)        | 1.389 | (1.324, 1.458) | 1.197 | (1.147, 1.250) |
|                                         | [14, $\infty$ ) | 1.355 | (1.291, 1.423) | 1.147 | (1.099, 1.198) |

**Supplementary Table S9. Numerical results for Figure 8**

|                         | Exposure interval | High school completion rate $\leq$ 25th percentile |                | High school completion rate $\geq$ 25th percentile |                |
|-------------------------|-------------------|----------------------------------------------------|----------------|----------------------------------------------------|----------------|
|                         |                   | Relative risk                                      | 95% CI         | Relative risk                                      | 95% CI         |
| Composite CVD           | [0, 5)            | 1                                                  | NA             | 1                                                  | NA             |
|                         | [5, 6)            | 1.085                                              | (1.072, 1.099) | 1.041                                              | (1.028, 1.055) |
|                         | [6, 7)            | 1.133                                              | (1.120, 1.146) | 1.081                                              | (1.068, 1.093) |
|                         | [7, 8)            | 1.186                                              | (1.173, 1.199) | 1.118                                              | (1.106, 1.130) |
|                         | [8, 9)            | 1.208                                              | (1.196, 1.221) | 1.156                                              | (1.144, 1.168) |
|                         | [9, 10)           | 1.259                                              | (1.245, 1.272) | 1.213                                              | (1.200, 1.225) |
|                         | [10, 11)          | 1.334                                              | (1.319, 1.349) | 1.303                                              | (1.290, 1.316) |
|                         | [11, 12)          | 1.442                                              | (1.424, 1.460) | 1.420                                              | (1.405, 1.434) |
|                         | [12, 13)          | 1.568                                              | (1.545, 1.591) | 1.523                                              | (1.507, 1.538) |
|                         | [13, 14)          | 1.621                                              | (1.591, 1.650) | 1.586                                              | (1.569, 1.603) |
|                         | [14, $\infty$ )   | 1.703                                              | (1.667, 1.741) | 1.633                                              | (1.616, 1.650) |
| Ischemic heart disease  | [0, 5)            | 1                                                  | NA             | 1                                                  | NA             |
|                         | [5, 6)            | 1.016                                              | (0.996, 1.036) | 1.001                                              | (0.983, 1.020) |
|                         | [6, 7)            | 1.035                                              | (1.017, 1.054) | 1.011                                              | (0.994, 1.028) |
|                         | [7, 8)            | 1.095                                              | (1.077, 1.113) | 1.004                                              | (0.988, 1.020) |
|                         | [8, 9)            | 1.112                                              | (1.095, 1.130) | 1.039                                              | (1.024, 1.055) |
|                         | [9, 10)           | 1.159                                              | (1.140, 1.177) | 1.111                                              | (1.095, 1.127) |
|                         | [10, 11)          | 1.247                                              | (1.226, 1.268) | 1.217                                              | (1.200, 1.235) |
|                         | [11, 12)          | 1.385                                              | (1.359, 1.411) | 1.372                                              | (1.352, 1.392) |
|                         | [12, 13)          | 1.557                                              | (1.523, 1.592) | 1.495                                              | (1.473, 1.518) |
|                         | [13, 14)          | 1.649                                              | (1.604, 1.694) | 1.585                                              | (1.561, 1.609) |
|                         | [14, $\infty$ )   | 1.782                                              | (1.726, 1.840) | 1.637                                              | (1.612, 1.662) |
| Cerebrovascular disease | [0, 5)            | 1                                                  | NA             | 1                                                  | NA             |
|                         | [5, 6)            | 1.110                                              | (1.089, 1.132) | 1.073                                              | (1.050, 1.095) |
|                         | [6, 7)            | 1.161                                              | (1.141, 1.182) | 1.141                                              | (1.120, 1.163) |
|                         | [7, 8)            | 1.222                                              | (1.201, 1.242) | 1.221                                              | (1.200, 1.243) |
|                         | [8, 9)            | 1.261                                              | (1.241, 1.282) | 1.279                                              | (1.257, 1.301) |
|                         | [9, 10)           | 1.330                                              | (1.309, 1.352) | 1.345                                              | (1.323, 1.367) |
|                         | [10, 11)          | 1.410                                              | (1.386, 1.435) | 1.422                                              | (1.398, 1.446) |
|                         | [11, 12)          | 1.500                                              | (1.471, 1.529) | 1.533                                              | (1.507, 1.558) |
|                         | [12, 13)          | 1.599                                              | (1.563, 1.636) | 1.633                                              | (1.605, 1.661) |
|                         | [13, 14)          | 1.636                                              | (1.591, 1.683) | 1.684                                              | (1.655, 1.713) |
|                         | [14, $\infty$ )   | 1.660                                              | (1.604, 1.717) | 1.712                                              | (1.682, 1.741) |
| Heart failure           | [0, 5)            | 1                                                  | NA             | 1                                                  | NA             |
|                         | [5, 6)            | 1.260                                              | (1.229, 1.292) | 1.137                                              | (1.109, 1.166) |
|                         | [6, 7)            | 1.366                                              | (1.335, 1.398) | 1.270                                              | (1.242, 1.299) |
|                         | [7, 8)            | 1.448                                              | (1.417, 1.479) | 1.385                                              | (1.356, 1.414) |
|                         | [8, 9)            | 1.483                                              | (1.452, 1.514) | 1.437                                              | (1.408, 1.466) |
|                         | [9, 10)           | 1.555                                              | (1.523, 1.588) | 1.506                                              | (1.476, 1.536) |
|                         | [10, 11)          | 1.653                                              | (1.617, 1.690) | 1.620                                              | (1.588, 1.653) |
|                         | [11, 12)          | 1.760                                              | (1.718, 1.803) | 1.764                                              | (1.729, 1.800) |
|                         | [12, 13)          | 1.874                                              | (1.821, 1.928) | 1.892                                              | (1.854, 1.930) |
|                         | [13, 14)          | 1.924                                              | (1.858, 1.992) | 1.953                                              | (1.913, 1.993) |
|                         | [14, $\infty$ )   | 1.972                                              | (1.892, 2.056) | 2.054                                              | (2.013, 2.097) |
| Cardiomyopathy          | [0, 5)            | 1                                                  | NA             | 1                                                  | NA             |
|                         | [5, 6)            | 1.011                                              | (0.870, 1.173) | 1.124                                              | (0.965, 1.309) |
|                         | [6, 7)            | 1.081                                              | (0.944, 1.237) | 1.108                                              | (0.964, 1.273) |
|                         | [7, 8)            | 1.103                                              | (0.972, 1.250) | 1.097                                              | (0.963, 1.249) |

|                                         |                 |       |                |       |                |
|-----------------------------------------|-----------------|-------|----------------|-------|----------------|
|                                         | [8, 9)          | 1.124 | (0.995, 1.270) | 1.094 | (0.965, 1.239) |
|                                         | [9, 10)         | 1.268 | (1.123, 1.432) | 1.197 | (1.058, 1.354) |
|                                         | [10, 11)        | 1.378 | (1.212, 1.567) | 1.266 | (1.120, 1.432) |
|                                         | [11, 12)        | 1.467 | (1.270, 1.694) | 1.369 | (1.209, 1.549) |
|                                         | [12, 13)        | 1.582 | (1.333, 1.877) | 1.497 | (1.320, 1.696) |
|                                         | [13, 14)        | 1.678 | (1.363, 2.066) | 1.587 | (1.396, 1.803) |
|                                         | [14, $\infty$ ) | 1.742 | (1.358, 2.235) | 1.595 | (1.405, 1.811) |
| Arrhythmia                              | [0, 5)          | 1     | NA             | 1     | NA             |
|                                         | [5, 6)          | 1.153 | (1.130, 1.175) | 1.100 | (1.077, 1.124) |
|                                         | [6, 7)          | 1.261 | (1.239, 1.283) | 1.193 | (1.170, 1.216) |
|                                         | [7, 8)          | 1.339 | (1.317, 1.362) | 1.273 | (1.250, 1.296) |
|                                         | [8, 9)          | 1.352 | (1.331, 1.374) | 1.305 | (1.282, 1.327) |
|                                         | [9, 10)         | 1.404 | (1.382, 1.427) | 1.350 | (1.327, 1.373) |
|                                         | [10, 11)        | 1.475 | (1.449, 1.500) | 1.410 | (1.386, 1.434) |
|                                         | [11, 12)        | 1.566 | (1.536, 1.596) | 1.482 | (1.457, 1.507) |
|                                         | [12, 13)        | 1.662 | (1.625, 1.700) | 1.532 | (1.506, 1.559) |
|                                         | [13, 14)        | 1.653 | (1.607, 1.701) | 1.551 | (1.523, 1.578) |
|                                         | [14, $\infty$ ) | 1.674 | (1.618, 1.732) | 1.539 | (1.512, 1.567) |
| Valvular heart disease                  | [0, 5)          | 1     | NA             | 1     | NA             |
|                                         | [5, 6)          | 1.079 | (1.042, 1.118) | 1.092 | (1.044, 1.143) |
|                                         | [6, 7)          | 1.071 | (1.037, 1.106) | 1.124 | (1.079, 1.171) |
|                                         | [7, 8)          | 1.123 | (1.090, 1.157) | 1.171 | (1.128, 1.217) |
|                                         | [8, 9)          | 1.069 | (1.039, 1.101) | 1.121 | (1.081, 1.163) |
|                                         | [9, 10)         | 1.010 | (0.980, 1.040) | 1.050 | (1.013, 1.089) |
|                                         | [10, 11)        | 0.950 | (0.920, 0.981) | 0.998 | (0.963, 1.035) |
|                                         | [11, 12)        | 0.894 | (0.861, 0.930) | 0.937 | (0.903, 0.972) |
|                                         | [12, 13)        | 0.870 | (0.828, 0.915) | 0.905 | (0.871, 0.940) |
|                                         | [13, 14)        | 0.825 | (0.772, 0.880) | 0.871 | (0.837, 0.906) |
|                                         | [14, $\infty$ ) | 0.800 | (0.737, 0.869) | 0.822 | (0.791, 0.856) |
| Thoracic and abdominal aortic aneurysms | [0, 5)          | 1     | NA             | 1     | NA             |
|                                         | [5, 6)          | 1.030 | (0.980, 1.082) | 0.995 | (0.946, 1.047) |
|                                         | [6, 7)          | 1.048 | (1.002, 1.097) | 0.975 | (0.931, 1.021) |
|                                         | [7, 8)          | 1.073 | (1.029, 1.120) | 0.967 | (0.926, 1.010) |
|                                         | [8, 9)          | 1.076 | (1.033, 1.121) | 0.983 | (0.943, 1.024) |
|                                         | [9, 10)         | 1.119 | (1.074, 1.166) | 0.991 | (0.951, 1.032) |
|                                         | [10, 11)        | 1.130 | (1.081, 1.181) | 1.053 | (1.011, 1.096) |
|                                         | [11, 12)        | 1.213 | (1.153, 1.276) | 1.117 | (1.072, 1.163) |
|                                         | [12, 13)        | 1.298 | (1.222, 1.380) | 1.145 | (1.099, 1.194) |
|                                         | [13, 14)        | 1.326 | (1.229, 1.430) | 1.187 | (1.137, 1.238) |
|                                         | [14, $\infty$ ) | 1.303 | (1.186, 1.432) | 1.141 | (1.093, 1.191) |

**Supplementary Table S10. Numerical results for Figure 9**

|                         | Exposure interval | Distance to the nearest hospital $\leq 75$ th percentile |                | Distance to the nearest hospital $\geq 75$ th percentile |                |
|-------------------------|-------------------|----------------------------------------------------------|----------------|----------------------------------------------------------|----------------|
|                         |                   | Relative risk                                            | 95% CI         | Relative risk                                            | 95% CI         |
| Composite CVD           | [0, 5)            | 1                                                        | NA             | 1                                                        | NA             |
|                         | [5, 6)            | 1.059                                                    | (1.042, 1.077) | 1.062                                                    | (1.049, 1.075) |
|                         | [6, 7)            | 1.096                                                    | (1.079, 1.112) | 1.149                                                    | (1.136, 1.162) |
|                         | [7, 8)            | 1.157                                                    | (1.141, 1.174) | 1.194                                                    | (1.181, 1.207) |
|                         | [8, 9)            | 1.205                                                    | (1.189, 1.222) | 1.250                                                    | (1.238, 1.262) |
|                         | [9, 10)           | 1.267                                                    | (1.250, 1.285) | 1.349                                                    | (1.336, 1.362) |
|                         | [10, 11)          | 1.369                                                    | (1.350, 1.388) | 1.484                                                    | (1.470, 1.499) |
|                         | [11, 12)          | 1.497                                                    | (1.476, 1.518) | 1.652                                                    | (1.635, 1.668) |
|                         | [12, 13)          | 1.630                                                    | (1.607, 1.653) | 1.759                                                    | (1.740, 1.778) |
|                         | [13, 14)          | 1.704                                                    | (1.680, 1.729) | 1.846                                                    | (1.825, 1.867) |
|                         | [14, $\infty$ )   | 1.774                                                    | (1.749, 1.799) | 1.936                                                    | (1.912, 1.961) |
| Ischemic heart disease  | [0, 5)            | 1                                                        | NA             | 1                                                        | NA             |
|                         | [5, 6)            | 0.998                                                    | (0.974, 1.022) | 1.025                                                    | (1.007, 1.045) |
|                         | [6, 7)            | 1.009                                                    | (0.988, 1.031) | 1.105                                                    | (1.086, 1.124) |
|                         | [7, 8)            | 1.051                                                    | (1.030, 1.073) | 1.130                                                    | (1.112, 1.148) |
|                         | [8, 9)            | 1.104                                                    | (1.082, 1.126) | 1.182                                                    | (1.165, 1.200) |
|                         | [9, 10)           | 1.182                                                    | (1.159, 1.205) | 1.307                                                    | (1.288, 1.326) |
|                         | [10, 11)          | 1.302                                                    | (1.277, 1.328) | 1.494                                                    | (1.472, 1.516) |
|                         | [11, 12)          | 1.477                                                    | (1.448, 1.507) | 1.727                                                    | (1.701, 1.753) |
|                         | [12, 13)          | 1.651                                                    | (1.618, 1.684) | 1.864                                                    | (1.835, 1.894) |
|                         | [13, 14)          | 1.760                                                    | (1.725, 1.796) | 2.008                                                    | (1.974, 2.042) |
|                         | [14, $\infty$ )   | 1.854                                                    | (1.817, 1.891) | 2.131                                                    | (2.092, 2.170) |
| Cerebrovascular disease | [0, 5)            | 1                                                        | NA             | 1                                                        | NA             |
|                         | [5, 6)            | 1.096                                                    | (1.069, 1.125) | 1.075                                                    | (1.053, 1.097) |
|                         | [6, 7)            | 1.147                                                    | (1.121, 1.174) | 1.164                                                    | (1.143, 1.187) |
|                         | [7, 8)            | 1.229                                                    | (1.202, 1.256) | 1.249                                                    | (1.227, 1.271) |
|                         | [8, 9)            | 1.293                                                    | (1.266, 1.321) | 1.325                                                    | (1.303, 1.347) |
|                         | [9, 10)           | 1.368                                                    | (1.339, 1.398) | 1.422                                                    | (1.399, 1.445) |
|                         | [10, 11)          | 1.458                                                    | (1.427, 1.490) | 1.531                                                    | (1.506, 1.557) |
|                         | [11, 12)          | 1.573                                                    | (1.540, 1.607) | 1.674                                                    | (1.646, 1.703) |
|                         | [12, 13)          | 1.687                                                    | (1.651, 1.724) | 1.792                                                    | (1.760, 1.824) |
|                         | [13, 14)          | 1.747                                                    | (1.709, 1.786) | 1.848                                                    | (1.812, 1.885) |
|                         | [14, $\infty$ )   | 1.791                                                    | (1.752, 1.830) | 1.889                                                    | (1.849, 1.929) |
| Heart failure           | [0, 5)            | 1                                                        | NA             | 1                                                        | NA             |
|                         | [5, 6)            | 1.198                                                    | (1.160, 1.236) | 1.171                                                    | (1.142, 1.201) |
|                         | [6, 7)            | 1.315                                                    | (1.278, 1.353) | 1.321                                                    | (1.291, 1.352) |
|                         | [7, 8)            | 1.442                                                    | (1.403, 1.482) | 1.429                                                    | (1.399, 1.461) |
|                         | [8, 9)            | 1.511                                                    | (1.471, 1.552) | 1.524                                                    | (1.493, 1.556) |
|                         | [9, 10)           | 1.596                                                    | (1.554, 1.639) | 1.643                                                    | (1.610, 1.677) |
|                         | [10, 11)          | 1.737                                                    | (1.692, 1.784) | 1.798                                                    | (1.762, 1.835) |
|                         | [11, 12)          | 1.893                                                    | (1.843, 1.945) | 2.018                                                    | (1.977, 2.061) |
|                         | [12, 13)          | 2.054                                                    | (1.999, 2.110) | 2.160                                                    | (2.114, 2.208) |
|                         | [13, 14)          | 2.136                                                    | (2.079, 2.195) | 2.242                                                    | (2.190, 2.296) |
|                         | [14, $\infty$ )   | 2.272                                                    | (2.212, 2.335) | 2.371                                                    | (2.312, 2.431) |
| Cardiomyopathy          | [0, 5)            | 1                                                        | NA             | 1                                                        | NA             |
|                         | [5, 6)            | 1.034                                                    | (0.859, 1.244) | 1.138                                                    | (0.973, 1.331) |
|                         | [6, 7)            | 1.077                                                    | (0.913, 1.270) | 1.165                                                    | (1.006, 1.350) |
|                         | [7, 8)            | 1.107                                                    | (0.946, 1.295) | 1.166                                                    | (1.017, 1.338) |

|                                         |                 |       |                |       |                |
|-----------------------------------------|-----------------|-------|----------------|-------|----------------|
|                                         | [8, 9)          | 1.141 | (0.979, 1.331) | 1.146 | (1.006, 1.305) |
|                                         | [9, 10)         | 1.261 | (1.083, 1.469) | 1.311 | (1.155, 1.489) |
|                                         | [10, 11)        | 1.335 | (1.146, 1.556) | 1.481 | (1.304, 1.682) |
|                                         | [11, 12)        | 1.450 | (1.244, 1.691) | 1.612 | (1.413, 1.838) |
|                                         | [12, 13)        | 1.603 | (1.373, 1.873) | 1.737 | (1.511, 1.996) |
|                                         | [13, 14)        | 1.705 | (1.457, 1.996) | 1.863 | (1.602, 2.165) |
|                                         | [14, $\infty$ ) | 1.718 | (1.470, 2.008) | 1.984 | (1.687, 2.333) |
| Arrhythmia                              | [0, 5)          | 1     | NA             | 1     | NA             |
|                                         | [5, 6)          | 1.128 | (1.099, 1.157) | 1.114 | (1.091, 1.138) |
|                                         | [6, 7)          | 1.208 | (1.181, 1.236) | 1.263 | (1.239, 1.288) |
|                                         | [7, 8)          | 1.301 | (1.273, 1.330) | 1.317 | (1.293, 1.341) |
|                                         | [8, 9)          | 1.329 | (1.301, 1.357) | 1.374 | (1.351, 1.398) |
|                                         | [9, 10)         | 1.374 | (1.345, 1.403) | 1.462 | (1.438, 1.487) |
|                                         | [10, 11)        | 1.441 | (1.411, 1.472) | 1.549 | (1.523, 1.575) |
|                                         | [11, 12)        | 1.524 | (1.492, 1.557) | 1.636 | (1.608, 1.665) |
|                                         | [12, 13)        | 1.593 | (1.559, 1.628) | 1.679 | (1.648, 1.711) |
|                                         | [13, 14)        | 1.617 | (1.582, 1.653) | 1.677 | (1.643, 1.712) |
|                                         | [14, $\infty$ ) | 1.604 | (1.569, 1.639) | 1.708 | (1.670, 1.747) |
| Valvular heart disease                  | [0, 5)          | 1     | NA             | 1     | NA             |
|                                         | [5, 6)          | 1.092 | (1.041, 1.146) | 1.082 | (1.038, 1.128) |
|                                         | [6, 7)          | 1.085 | (1.039, 1.133) | 1.117 | (1.074, 1.161) |
|                                         | [7, 8)          | 1.120 | (1.075, 1.166) | 1.172 | (1.131, 1.215) |
|                                         | [8, 9)          | 1.062 | (1.021, 1.106) | 1.111 | (1.074, 1.150) |
|                                         | [9, 10)         | 0.990 | (0.951, 1.030) | 1.047 | (1.012, 1.084) |
|                                         | [10, 11)        | 0.938 | (0.901, 0.976) | 0.970 | (0.937, 1.005) |
|                                         | [11, 12)        | 0.875 | (0.840, 0.912) | 0.910 | (0.876, 0.945) |
|                                         | [12, 13)        | 0.853 | (0.819, 0.890) | 0.837 | (0.802, 0.873) |
|                                         | [13, 14)        | 0.807 | (0.773, 0.843) | 0.835 | (0.795, 0.877) |
|                                         | [14, $\infty$ ) | 0.764 | (0.732, 0.797) | 0.786 | (0.743, 0.831) |
| Thoracic and abdominal aortic aneurysms | [0, 5)          | 1     | NA             | 1     | NA             |
|                                         | [5, 6)          | 0.983 | (0.925, 1.044) | 1.060 | (1.007, 1.116) |
|                                         | [6, 7)          | 0.978 | (0.927, 1.033) | 1.105 | (1.053, 1.159) |
|                                         | [7, 8)          | 0.995 | (0.945, 1.048) | 1.116 | (1.068, 1.167) |
|                                         | [8, 9)          | 1.012 | (0.963, 1.064) | 1.150 | (1.103, 1.200) |
|                                         | [9, 10)         | 1.031 | (0.981, 1.083) | 1.204 | (1.156, 1.255) |
|                                         | [10, 11)        | 1.092 | (1.038, 1.147) | 1.273 | (1.221, 1.327) |
|                                         | [11, 12)        | 1.170 | (1.113, 1.230) | 1.357 | (1.299, 1.417) |
|                                         | [12, 13)        | 1.219 | (1.159, 1.283) | 1.391 | (1.328, 1.457) |
|                                         | [13, 14)        | 1.267 | (1.202, 1.334) | 1.442 | (1.370, 1.518) |
|                                         | [14, $\infty$ ) | 1.225 | (1.164, 1.290) | 1.437 | (1.358, 1.522) |

**Supplementary Table S11. Numerical results for Figure 10**

|                         | Exposure interval | ADI ≤75th percentile |                | ADI ≥75th percentile |                |
|-------------------------|-------------------|----------------------|----------------|----------------------|----------------|
|                         |                   | Relative risk        | 95% CI         | Relative risk        | 95% CI         |
| Composite CVD           | [0, 5)            | 1                    | NA             | 1                    | NA             |
|                         | [5, 6)            | 1.060                | (1.049, 1.070) | 1.077                | (1.044, 1.111) |
|                         | [6, 7)            | 1.105                | (1.096, 1.115) | 1.181                | (1.149, 1.214) |
|                         | [7, 8)            | 1.158                | (1.148, 1.167) | 1.257                | (1.225, 1.291) |
|                         | [8, 9)            | 1.204                | (1.195, 1.214) | 1.287                | (1.254, 1.319) |
|                         | [9, 10)           | 1.269                | (1.259, 1.279) | 1.375                | (1.341, 1.410) |
|                         | [10, 11)          | 1.371                | (1.361, 1.382) | 1.486                | (1.450, 1.524) |
|                         | [11, 12)          | 1.501                | (1.490, 1.513) | 1.648                | (1.608, 1.690) |
|                         | [12, 13)          | 1.627                | (1.614, 1.640) | 1.773                | (1.729, 1.819) |
|                         | [13, 14)          | 1.710                | (1.696, 1.725) | 1.839                | (1.792, 1.887) |
| [14, ∞)                 | 1.778             | (1.763, 1.793)       | 1.937          | (1.887, 1.988)       |                |
| Ischemic heart disease  | [0, 5)            | 1                    | NA             | 1                    | NA             |
|                         | [5, 6)            | 0.998                | (0.984, 1.012) | 1.080                | (1.033, 1.130) |
|                         | [6, 7)            | 1.020                | (1.007, 1.034) | 1.138                | (1.093, 1.184) |
|                         | [7, 8)            | 1.052                | (1.040, 1.065) | 1.169                | (1.125, 1.214) |
|                         | [8, 9)            | 1.104                | (1.092, 1.117) | 1.167                | (1.125, 1.211) |
|                         | [9, 10)           | 1.185                | (1.172, 1.199) | 1.261                | (1.216, 1.307) |
|                         | [10, 11)          | 1.309                | (1.294, 1.324) | 1.401                | (1.351, 1.453) |
|                         | [11, 12)          | 1.493                | (1.476, 1.511) | 1.586                | (1.529, 1.645) |
|                         | [12, 13)          | 1.663                | (1.644, 1.683) | 1.708                | (1.646, 1.772) |
|                         | [13, 14)          | 1.788                | (1.767, 1.810) | 1.797                | (1.731, 1.866) |
| [14, ∞)                 | 1.877             | (1.854, 1.899)       | 1.900          | (1.829, 1.973)       |                |
| Cerebrovascular disease | [0, 5)            | 1                    | NA             | 1                    | NA             |
|                         | [5, 6)            | 1.094                | (1.078, 1.111) | 1.059                | (1.004, 1.117) |
|                         | [6, 7)            | 1.151                | (1.136, 1.167) | 1.222                | (1.167, 1.280) |
|                         | [7, 8)            | 1.227                | (1.212, 1.243) | 1.357                | (1.299, 1.418) |
|                         | [8, 9)            | 1.288                | (1.272, 1.304) | 1.433                | (1.373, 1.495) |
|                         | [9, 10)           | 1.362                | (1.345, 1.378) | 1.535                | (1.471, 1.601) |
|                         | [10, 11)          | 1.450                | (1.432, 1.468) | 1.639                | (1.571, 1.710) |
|                         | [11, 12)          | 1.563                | (1.544, 1.583) | 1.798                | (1.724, 1.876) |
|                         | [12, 13)          | 1.673                | (1.652, 1.695) | 1.933                | (1.852, 2.017) |
|                         | [13, 14)          | 1.737                | (1.714, 1.761) | 1.991                | (1.906, 2.080) |
| [14, ∞)                 | 1.781             | (1.758, 1.805)       | 2.050          | (1.962, 2.143)       |                |
| Heart failure           | [0, 5)            | 1                    | NA             | 1                    | NA             |
|                         | [5, 6)            | 1.203                | (1.181, 1.226) | 1.099                | (1.034, 1.168) |
|                         | [6, 7)            | 1.326                | (1.304, 1.349) | 1.309                | (1.241, 1.380) |
|                         | [7, 8)            | 1.442                | (1.419, 1.465) | 1.468                | (1.395, 1.544) |
|                         | [8, 9)            | 1.511                | (1.488, 1.534) | 1.532                | (1.458, 1.609) |
|                         | [9, 10)           | 1.593                | (1.569, 1.617) | 1.656                | (1.577, 1.739) |
|                         | [10, 11)          | 1.724                | (1.698, 1.750) | 1.818                | (1.731, 1.909) |
|                         | [11, 12)          | 1.877                | (1.848, 1.906) | 2.051                | (1.953, 2.154) |
|                         | [12, 13)          | 2.029                | (1.997, 2.061) | 2.222                | (2.115, 2.335) |
|                         | [13, 14)          | 2.125                | (2.090, 2.160) | 2.276                | (2.164, 2.393) |
| [14, ∞)                 | 2.254             | (2.218, 2.291)       | 2.481          | (2.359, 2.611)       |                |
| Cardiomyopathy          | [0, 5)            | 1                    | NA             | 1                    | NA             |
|                         | [5, 6)            | 1.056                | (0.944, 1.182) | 1.210                | (0.831, 1.761) |
|                         | [6, 7)            | 1.099                | (0.992, 1.218) | 1.144                | (0.815, 1.605) |
|                         | [7, 8)            | 1.115                | (1.013, 1.226) | 1.182                | (0.857, 1.630) |
|                         | [8, 9)            | 1.160                | (1.059, 1.271) | 1.033                | (0.756, 1.413) |

|                                         |          |       |                |       |                |
|-----------------------------------------|----------|-------|----------------|-------|----------------|
|                                         | [9, 10)  | 1.283 | (1.172, 1.404) | 1.214 | (0.891, 1.654) |
|                                         | [10, 11) | 1.366 | (1.248, 1.495) | 1.339 | (0.984, 1.822) |
|                                         | [11, 12) | 1.485 | (1.354, 1.629) | 1.450 | (1.064, 1.977) |
|                                         | [12, 13) | 1.602 | (1.456, 1.763) | 1.698 | (1.244, 2.320) |
|                                         | [13, 14) | 1.730 | (1.567, 1.909) | 1.739 | (1.263, 2.394) |
|                                         | [14, ∞)  | 1.772 | (1.607, 1.954) | 1.861 | (1.240, 2.373) |
| Arrhythmia                              | [0, 5)   | 1     | NA             | 1     | NA             |
|                                         | [5, 6)   | 1.126 | (1.109, 1.143) | 1.121 | (1.062, 1.183) |
|                                         | [6, 7)   | 1.223 | (1.206, 1.240) | 1.309 | (1.249, 1.373) |
|                                         | [7, 8)   | 1.307 | (1.291, 1.324) | 1.385 | (1.324, 1.449) |
|                                         | [8, 9)   | 1.342 | (1.326, 1.359) | 1.398 | (1.338, 1.461) |
|                                         | [9, 10)  | 1.392 | (1.375, 1.409) | 1.472 | (1.409, 1.538) |
|                                         | [10, 11) | 1.466 | (1.448, 1.484) | 1.527 | (1.462, 1.595) |
|                                         | [11, 12) | 1.546 | (1.527, 1.566) | 1.629 | (1.560, 1.703) |
|                                         | [12, 13) | 1.615 | (1.594, 1.636) | 1.671 | (1.598, 1.746) |
|                                         | [13, 14) | 1.635 | (1.613, 1.658) | 1.685 | (1.610, 1.763) |
|                                         | [14, ∞)  | 1.625 | (1.603, 1.647) | 1.723 | (1.646, 1.805) |
| Valvular heart disease                  | [0, 5)   | 1     | NA             | 1     | NA             |
|                                         | [5, 6)   | 1.083 | (1.052, 1.115) | 1.133 | (1.002, 1.281) |
|                                         | [6, 7)   | 1.072 | (1.044, 1.101) | 1.340 | (1.203, 1.493) |
|                                         | [7, 8)   | 1.125 | (1.098, 1.154) | 1.265 | (1.140, 1.403) |
|                                         | [8, 9)   | 1.069 | (1.044, 1.095) | 1.202 | (1.087, 1.329) |
|                                         | [9, 10)  | 1.002 | (0.979, 1.026) | 1.106 | (1.001, 1.223) |
|                                         | [10, 11) | 0.949 | (0.926, 0.972) | 1.020 | (0.923, 1.128) |
|                                         | [11, 12) | 0.890 | (0.868, 0.912) | 0.939 | (0.848, 1.039) |
|                                         | [12, 13) | 0.859 | (0.837, 0.883) | 0.884 | (0.797, 0.980) |
|                                         | [13, 14) | 0.821 | (0.797, 0.845) | 0.849 | (0.761, 0.947) |
|                                         | [14, ∞)  | 0.765 | (0.743, 0.788) | 0.839 | (0.750, 0.939) |
| Thoracic and abdominal aortic aneurysms | [0, 5)   | 1     | NA             | 1     | NA             |
|                                         | [5, 6)   | 1.003 | (0.966, 1.040) | 1.073 | (0.941, 1.222) |
|                                         | [6, 7)   | 1.007 | (0.974, 1.042) | 1.077 | (0.959, 1.210) |
|                                         | [7, 8)   | 1.021 | (0.989, 1.053) | 1.076 | (0.964, 1.201) |
|                                         | [8, 9)   | 1.041 | (1.010, 1.072) | 1.074 | (0.966, 1.195) |
|                                         | [9, 10)  | 1.068 | (1.037, 1.100) | 1.081 | (0.973, 1.201) |
|                                         | [10, 11) | 1.134 | (1.100, 1.168) | 1.116 | (1.004, 1.240) |
|                                         | [11, 12) | 1.212 | (1.175, 1.250) | 1.194 | (1.074, 1.328) |
|                                         | [12, 13) | 1.260 | (1.220, 1.301) | 1.224 | (1.100, 1.363) |
|                                         | [13, 14) | 1.308 | (1.264, 1.352) | 1.268 | (1.135, 1.416) |
|                                         | [14, ∞)  | 1.254 | (1.213, 1.297) | 1.285 | (1.148, 1.439) |

**Supplementary Figure S1. E-R relationships between calibrated lag 0–2 PM<sub>2.5</sub> concentration and relative risks (and 95% CIs) of incident hospitalizations for subtypes of arrhythmia**

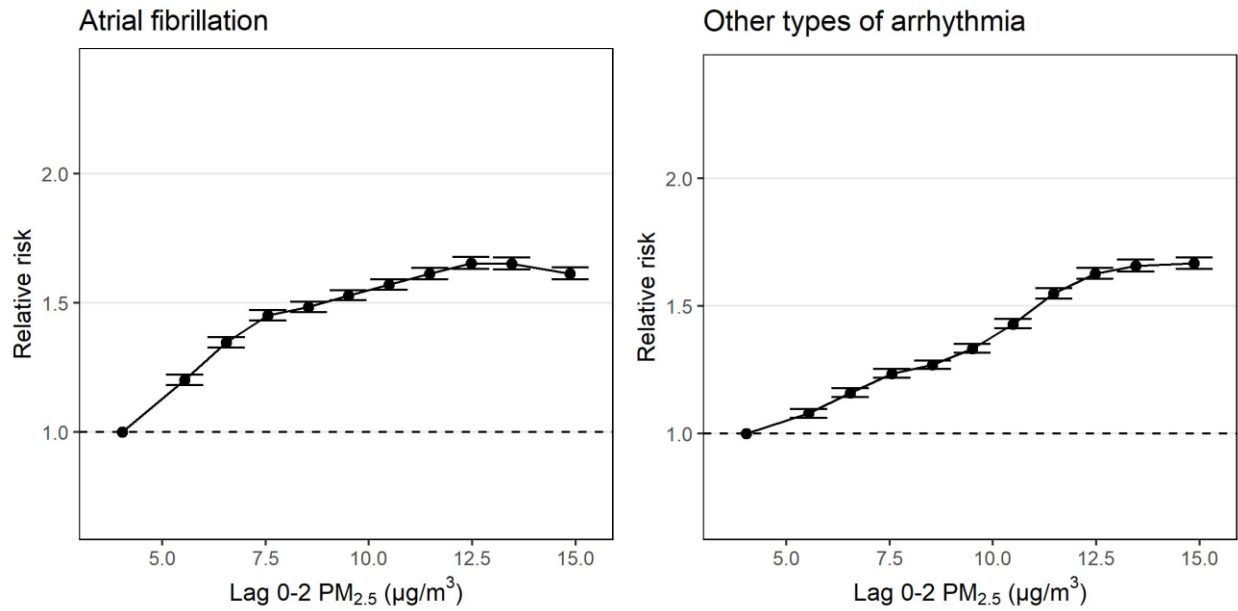



**Supplementary Figure S2. E-R relationships between calibrated lag 0–2 PM<sub>2.5</sub> concentration and relative risks (and 95% CIs) of incident hospitalizations for subtypes of valvular heart disease**

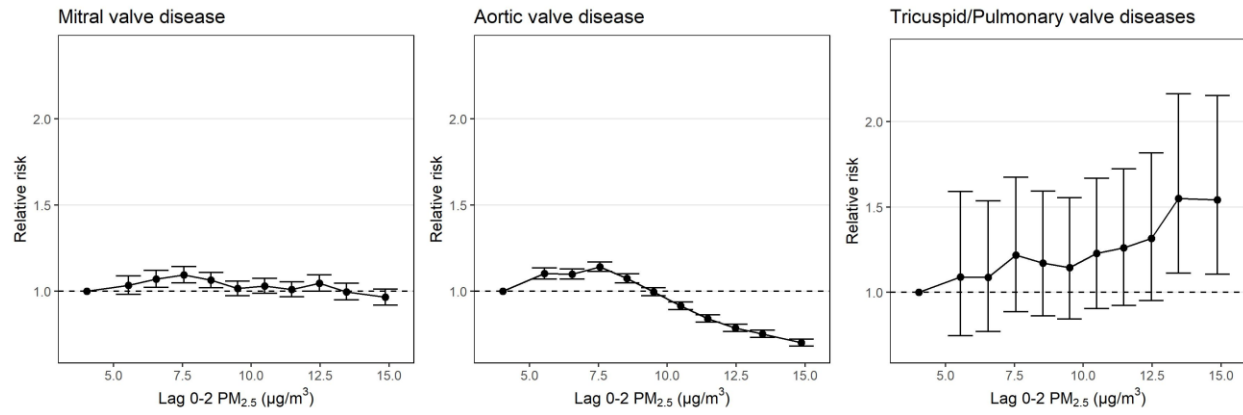

**Supplementary Figure S3. E-R relationships between calibrated lag 0–2 PM<sub>2.5</sub> exposure and relative risks (and 95% CIs) of incident CVD hospitalizations, excluding individual-level characteristics**

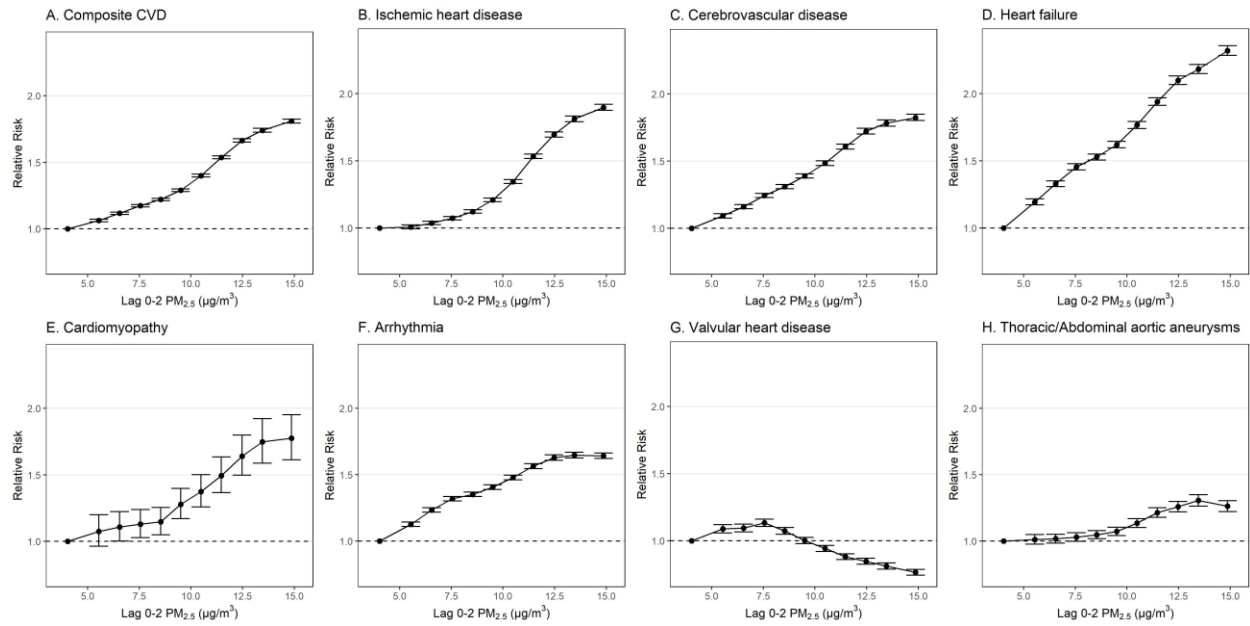

Supplement: weiy076939.ww.pdf [file weiy076939.ww.pdf]
